# Supplementary material
Source: ML conference proceedings conference paper supplement (https://proceedings.neurips.cc/paper_files/paper/2020/hash/db346ccb62d491029b590bbbf0f5c412-Abstract.html)
Supplement: Supplementary file [file db346ccb62d491029b590bbbf0f5c412-Supplemental.pdf]

---

# Hedging in games: Faster convergence of external and swap regrets

---

Anonymous Author(s)

Affiliation

Address

email

## Abstract

1 We consider the setting where players run the Hedge algorithm or its optimistic  
2 variant [27] to play an  $n$ -action game repeatedly for  $T$  rounds.

- 3 • For two-player games, we show that the regret of optimistic Hedge decays at  
4 rate  $O(1/T^{5/6})$ , improving the previous bound of  $O(1/T^{3/4})$  by [27].
- 5 • In contrast, we show that the convergence rate of vanilla Hedge is no better  
6 than  $O(1/\sqrt{T})$ , addressing an open question posed in [27].

7 For general  $m$ -player games, we show that the swap regret of each player decays at  
8  $O(m^{1/2}(n \log n/T)^{3/4})$  when they combine optimistic Hedge with the classical  
9 external-to-internal reduction of Blum and Mansour [6]. Via standard connec-  
10 tions, our new (swap) regret bounds imply faster convergence to coarse correlated  
11 equilibria in two-player games and to correlated equilibria in multiplayer games.

## 12 1 Introduction

13 Online algorithms for regret minimization play an important role in many applications in machine  
14 learning where real-time sequential decision making is crucial [19, 7, 26]. A number of algorithms  
15 have been developed, including Hedge/Multiplicative Weights [2], Mirror Decent [19], Follow the  
16 Regularized/Perturbed Leader [20], and their power and limits against an adversarial environment  
17 have been well understood: The average (external) regret decays at a rate of  $O(1/\sqrt{T})$  after  $T$  rounds,  
18 which is known to be tight for any online algorithm.

19 What happens if players in a repeated game run one of these algorithms? Given that they are now  
20 running against similar algorithms over a fixed game, could the regret of each player decay signifi-  
21 cantly faster than  $1/\sqrt{T}$ ? This was answered positively in a sequence of works [9, 24, 27]. Among  
22 these results, the one that is most relevant to ours is that of Syrgkanis, Agarwal, Luo and Schapire  
23 [27]. They showed that if every player in a multiplayer game runs an algorithm that satisfies the  
24 RVU (Regret bounded by Variation in Utilities) property, then the regret of each player decays at  
25  $O(1/T^{3/4})$ . *Can this bound be further improved?*

26 Besides regret minimization, understanding no-regret dynamics in games is motivated by connections  
27 with various equilibrium concepts [15, 13, 12, 18, 6, 17, 22]. For example, if every player runs an  
28 algorithm with vanishing regret, then the empirical distribution must converge to a *coarse* correlated  
29 equilibrium [7]. Nevertheless, to converge to a more preferred correlated equilibrium [3], a stronger  
30 notion of regrets called *swap regrets* (see Section 2) is required [13, 18, 6]. The minimization of  
31 swap regrets under the adversarial setting was studied by Blum and Mansour [6]. They gave a generic  
32 reduction from regret minimization algorithms which led to a tight  $O(\sqrt{n \log n/T})$ -bound for the  
33 average swap regret. A natural question is *whether a speedup similar to that of [27] is possible for*  
34 *swap regrets in the repeated game setting.*

35 **Our contributions: Faster convergence of swap regrets.** We give the first algorithm that achieves  
 36 an average swap regret that is significantly lower than  $O(1/\sqrt{T})$  under the repeated game setting.  
 37 This algorithm, denoted by `BM-Optimistic-Hedge`, combines the external-to-internal reduction of  
 38 [6] with the optimistic Hedge algorithm [24, 27] as its regret minimization component. (Optimistic  
 39 Hedge can be viewed as an instantiation of the optimistic Follow the Regularized Leader algorithm;  
 40 see Section 2.) We show that if every player in a repeated game of  $m$  players and  $n$  actions  
 41 runs `BM-Optimistic-Hedge`, then the average swap regret is at most  $O(m^{1/2}(n \log n/T)^{3/4})$ ; see  
 42 Theorem 5.1 in Section 5. Via the relationship between correlated equilibria and swap regrets, our  
 43 result implies faster convergence to a correlated equilibrium. When specialized to two-player games,  
 44 the empirical distribution of players running `BM-Optimistic-Hedge` converges to an  $\epsilon$ -correlated  
 45 equilibrium after  $O(n \log n/\epsilon^{4/3})$  rounds, improving the  $O(n \log n/\epsilon^2)$  bound of [6].

46 Our main technical lemma behind Theorem 5.1 shows that strategies produced by the algorithm  
 47 of [6] with optimistic Hedge moves very slowly in  $\ell_1$ -norm under the adversarial setting (which  
 48 in turn allows us to apply a stability argument similar to [27]). This came as a surprise because  
 49 a key component of the algorithm of [6] each round is to compute the stationary distribution of a  
 50 Markov chain, which is highly sensitive to small changes in the Markov chain. We overcome this  
 51 difficulty by exploiting the fact that Hedge only incurs small *multiplicative* changes to the Markov  
 52 chain, which allows us to bound the change in the stationary distribution using the classical Markov  
 53 chain tree theorem. We further demonstrate the power of this technical ingredient by deriving another  
 54 fast no-swap regret algorithm, based on a folklore algorithm in [7] and optimistic predictions (see  
 55 Appendix D). Both of these two algorithms enjoy the benefits of faster convergence when playing  
 56 with each other, while remain robust against adversaries (see Corollary 5.4 in Appendix C).

57 **Our contributions: Hedge in two-player games.** In addition we consider regret minimization in a  
 58 two-player game with  $n$  actions using either vanilla or optimistic Hedge. We show that optimistic  
 59 Hedge can achieve an average regret of  $O(1/T^{5/6})$ , improving the bound  $O(1/T^{3/4})$  by [27] for  
 60 two-player games; see Theorem 3.1 in Section 3. In contrast, we show that even under this game-  
 61 theoretic setting, vanilla Hedge cannot asymptotically outperform the  $O(1/\sqrt{T})$  adversarial bound;  
 62 see Theorem 4.1 in Section 4. This addresses an open question posed by [27] concerning the  
 63 convergence rate of vanilla Hedge in a repeated game.

64 The key step in our analysis of optimistic Hedge is to show that, even under the adversarial setting,  
 65 the trajectory length of strategy movements (in their squared  $\ell_1$ -norm) can be bounded using that of  
 66 cost vectors (in  $\ell_\infty$ -norm); see Lemma 3.2. (Intuitively, it is unlikely for the strategy of optimistic  
 67 Hedge to change significantly over time while the loss vector stays stable.) This allows us to build a  
 68 strong relationship between the trajectory length of each player’s strategy movements, and then use  
 69 the RVU property of optimistic Hedge to bound their individual regrets.

70 Our lower bounds for vanilla Hedge use three very simple  $2 \times 2$  games to handle different ranges of  
 71 the learning rate  $\eta$ . For the most intriguing case when  $\eta$  is at least  $\Omega(1/\sqrt{n})$  and bounded from above  
 72 by some constant, we study the zero-sum Matching Pennies game and use it to show that the overall  
 73 regret of at least one player is  $\Omega(\sqrt{T})$ . Our analysis is inspired by the result of [5] which shows that  
 74 the KL divergence of strategies played by Hedge in a two-player zero-sum game is strictly increasing.  
 75 For Matching Pennies, we start with a quantitative bound on how fast the KL divergence grows in  
 76 Lemma 4.3. This implies the existence of a window of length  $\sqrt{T}$  during which the cost of one of the  
 77 player grows by  $\Omega(1)$  each round; the zero-sum structure of the game allows us to conclude that at  
 78 least one of the players must have regret at least  $\Omega(\sqrt{T})$  at some point in this window.

## 79 1.1 Related work

80 Initiated by Daskalakis, Deckelbaum and Kim [9], there has been a sequence of works that study  
 81 no-regret learning algorithms in games [24, 27, 14, 29]. Daskalakis et. al. [9] designed an algorithm  
 82 by adapting Nesterov’s accelerated saddle point algorithm to two-player *zero-sum games*, and showed  
 83 that if both players run this algorithm then their average regrets decay at rate  $O(1/T)$ , which is  
 84 optimal. Later Rakhlin and Sridharan [23, 24] developed a simple and intuitive family of algorithms,  
 85 i.e. *optimistic Mirror Descent* and *optimistic Follow the Regularized Leader*, that incorporate  
 86 predictions into the strategy. They proved that if both players adopt the algorithm, then their average  
 87 regrets also decay at rate  $O(1/T)$  in *zero sum games*. Syrgkanis et. al. [27] further strengthened  
 88 this line of works by showing that in a *general m-player game*, if every player runs an algorithm  
 89 that satisfies the RVU property then the average regret decays at rate  $O(1/T^{3/4})$ . Syrgkanis et.

90 al. [27] also considered the convergence of social welfare and proved an even faster rate of  $O(1/T)$   
 91 in smooth games [25]. Foster et. al. [14] extended [27] and showed that if one only aims for an  
 92 approximately optimal social welfare, then the class of algorithms allowed can be much broader.  
 93 Recently, Daskalakis and Panageas [11] proved the last iteration convergence of optimistic Hedge  
 94 in zero-sum game, i.e., instead of averaging over the trajectory, they showed that optimistic Hedge  
 95 converges to a Nash equilibrium in a zero-sum game.

96 There is also a growing body of works [21, 5, 4, 8] on the dynamics of no-regret learning over  
 97 games in the last few years. Most of these works studied the dynamics of no-regret learning from  
 98 a dynamical system point of view and provided qualitative intuition on the evolution of no-regret  
 99 learning. Among them, [4] is most relevant, in which Bailey and Piliouras proved an  $\Omega(\sqrt{T})$  lower  
 100 bound on the convergence rate of online gradient descent [30] for the  $2 \times 2$  Matching Pennies game.  
 101 However, we remark that their lower bound only works for online gradient descent and they need  
 102 to fix the learning rate  $\eta$  to 1. Our lower bound for vanilla Hedge in two-player games holds for  
 103 arbitrary learning rates.

## 104 2 Preliminary

105 **Notation.** Given two positive integers  $n \leq m$ , we use  $[n]$  to denote  $\{1, \dots, n\}$  and  $[n : m]$  to denote  
 106  $\{n, \dots, m\}$ . We use  $D_{\text{KL}}(p||q)$  to denote the KL divergence with natural logarithm.

107 **Repeated games and regrets.** Consider a game  $G$  played between  $m$  players, where each player  
 108  $i \in [m]$  has a strategy space  $S_i$  with  $|S_i| = n$  and a *loss* function  $\mathcal{L}_i : S_1 \times \dots \times S_m \rightarrow [0, 1]$  such  
 109 that  $\mathcal{L}_i(\mathbf{s})$  is the loss of player  $i$  for each pure strategy profile  $\mathbf{s} = (s_1, \dots, s_m) \in S_1 \times \dots \times S_m$ . A  
 110 mixed strategy for player  $i$  is a probability distribution  $x_i$  over  $S_i$ , where the  $j$ th action is played with  
 111 probability  $x_i(j)$ . Given a mixed (or pure) strategy profile  $\mathbf{x} = (x_1, \dots, x_m)$  (or  $\mathbf{s} = (s_1, \dots, s_m)$ ),  
 112 we write  $\mathbf{x}_{-i}$  (or  $\mathbf{s}_{-i}$ ) to denote the profile after removing  $x_i$  (or  $s_i$ , respectively).

113 We consider the scenario where the  $m$  players play  $G$  repeatedly for  $T$  rounds. At the beginning of  
 114 each round  $t$ ,  $t \in [T]$ , each player  $i$  picks a mixed strategy  $x_i^t$  and let  $\mathbf{x}^t = (x_1^t, \dots, x_m^t)$  be the mixed  
 115 strategy profile. We consider the *full information* setting where each player observes the *expected* loss  
 116 of *all* her actions. Formally, player  $i$  observes a loss vector  $\ell_i^t$  with  $\ell_i^t(j) = \mathbb{E}_{\mathbf{s}_{-i} \sim \mathbf{x}_{-i}^t} [\mathcal{L}_i(j, \mathbf{s}_{-i})]$ ,  
 117 and her expected loss is given by  $\langle x_i^t, \ell_i^t \rangle$ . At the end of round  $T$ , the *regret* of player  $i$  is

$$\text{regret}_T^i = \sum_{t \in [T]} \langle x_i^t, \ell_i^t \rangle - \min_{j \in [n]} \sum_{t \in [T]} \ell_i^t(j), \quad (1)$$

118 i.e., the maximum gain one could have obtained by switching to some fixed action. A stronger notion  
 119 of regret, referred as *swap regret*, is defined as

$$\text{swap-regret}_T^i = \sum_{t \in [T]} \langle x_i^t, \ell_i^t \rangle - \min_{\phi} \sum_{t \in [T]} \sum_{j \in [n]} x_i^t(j) \cdot \ell_i^t(\phi(j)), \quad (2)$$

120 where the minimum is over all  $n^n$  (swap) functions  $\phi : [n] \rightarrow [n]$  that swap action  $j$  with  $\phi(j)$ . The  
 121 swap regret equals the maximum gain one could have achieved by using a fixed swap function over  
 122 its past mixed strategies.

**Hedge.** Consider the adversarial online model where a player has  $n$  actions and picks a distribution  
 $x^t$  over them at the beginning of each round  $t$ . During round  $t$  the player receives a loss vector  $\ell^t$  and  
 pays a loss of  $\langle x^t, \ell^t \rangle$ . The vanilla Hedge algorithm [16] with learning rate  $\eta > 0$  starts by setting  $x^1$   
 to be the uniform distribution and then keeps applying the following updating rule to obtain  $x^{t+1}$   
 from  $x^t$  and the loss vector  $\ell^t$  at the end of round  $t$ : for each action  $j \in [n]$ ,

$$x^{t+1}(j) = \frac{x^t(j) \cdot \exp(-\eta \cdot \ell^t(j))}{\sum_{k \in [n]} x^t(k) \cdot \exp(-\eta \cdot \ell^t(k))}.$$

123 On the other hand, the optimistic Hedge algorithm can be obtained from the *optimistic follow the*  
 124 *regularized leader* proposed by [24, 27], and have the following updating rule:

$$x^{t+1}(j) = \frac{x^t(j) \cdot \exp(-\eta(2\ell^t(j) - \ell^{t-1}(j)))}{\sum_{k \in [n]} x^t(k) \cdot \exp(-\eta(2\ell^t(k) - \ell^{t-1}(k)))}, \quad (3)$$

125 with  $\ell^0 = \mathbf{0}$  being the all-zero vector. We have the following regret bound for optimistic Hedge.

126 **Lemma 2.1** ([24, 27]). *Under the adversarial setting, optimistic Hedge satisfies*

$$\text{regret}_T \leq \frac{2 \log n}{\eta} + \eta \sum_{t \in [T]} \|\ell^t - \ell^{t-1}\|_\infty^2 - \frac{1}{4\eta} \sum_{t \in [T]} \|x^{t+1} - x^t\|_1^2. \quad (4)$$

### 127 3 Optimistic Hedge in Two-Player Games

128 In this section we analyze the performance of the optimistic Hedge algorithm when it is used by two  
129 players to play a (general, not necessarily zero-sum)  $n \times n$  game repeatedly.

130 **Theorem 3.1.** *Suppose both players in a two-player game run optimistic Hedge for  $T$  rounds with*  
131 *learning rate  $\eta = (\log n/T)^{1/6}$ . Then the individual regret of each player is  $O(T^{1/6} \log^{5/6} n)$ .*

132 We assume without loss of generality that  $T \geq \log n$ ; otherwise, the regret of each player is trivially  
133 at most  $T \leq T^{1/6} \log^{5/6} n$ . The following lemma is essential to our proof of Theorem 3.1. Consider  
134 the adversarial online setting where a player runs optimistic Hedge for  $T$  rounds. The lemma bounds  
135 the trajectory length of the strategy movement using that of cost vectors.

136 **Lemma 3.2.** *Suppose that a player runs optimistic Hedge with learning rate  $\eta$  for  $T$  rounds. Let*  
137  *$\ell^0, \ell^1, \dots, \ell^T$  be the cost vectors with  $\ell^0 = \mathbf{0}$  and  $x^1, \dots, x^T$  be the strategies played. Then*

$$\sum_{t \in [2:T]} \|x^t - x^{t-1}\|_1^2 \leq O(\log n) + O(\eta + \eta^2) \sum_{t \in [T-1]} \|\ell^t - \ell^{t-1}\|_\infty. \quad (5)$$

138 We delay the proof of Lemma 3.2 to Appendix A and use it to prove Theorem 3.1.

139 *Proof of Theorem 3.1 assuming Lemma 3.2.* Let  $G = (A, B)$  be the game, where  $A, B \in [0, 1]^{n \times n}$   
140 denote the cost matrices of the first and second players, respectively. We use  $x^t$  and  $y^t$  to denote  
141 strategies played by the two players and use  $\ell_x^t$  and  $\ell_y^t$  to denote their cost vectors in the  $t$ th round.  
142 So we have  $\ell_x^t = Ay^t$  and  $\ell_y^t = B^T x^t$ . Therefore, we have for each  $t \geq 2$ :

$$\begin{aligned} \|\ell_y^t - \ell_y^{t-1}\|_\infty &= \|B^T(x^t - x^{t-1})\|_\infty \leq \|x^t - x^{t-1}\|_1 \quad \text{and} \\ \|\ell_x^t - \ell_x^{t-1}\|_\infty &= \|A(y^t - y^{t-1})\|_\infty \leq \|y^t - y^{t-1}\|_1. \end{aligned} \quad (6)$$

143 Without loss of generality it suffices to bound the regret of the second player. Set  $\eta = (\log n/T)^{1/6}$   
144 with  $T \geq \log n$  so that  $\eta \leq 1$ . We have

$$\begin{aligned} \text{regret}_T^y &\leq \frac{2 \log n}{\eta} + \eta \sum_{t \in [T]} \|\ell_y^t - \ell_y^{t-1}\|_\infty^2 - \frac{1}{4\eta} \sum_{t \in [T]} \|y^{t+1} - y^t\|_1^2 && \text{Lemma 2.1} \\ &\leq \frac{2 \log n}{\eta} + \eta + \eta \sum_{t \in [2:T]} \|x^t - x^{t-1}\|_1^2 - \frac{1}{4\eta} \sum_{t \in [2:T+1]} \|\ell_x^t - \ell_x^{t-1}\|_\infty^2 && \text{using (6)} \\ &\leq \frac{2 \log n}{\eta} + \eta + \eta \left( O(\log n) + O(\eta) \sum_{t \in [T-1]} \|\ell_x^t - \ell_x^{t-1}\|_\infty \right) \\ &\quad - \frac{1}{4\eta} \sum_{t \in [T-1]} \|\ell_x^t - \ell_x^{t-1}\|_\infty^2 + \frac{1}{4\eta} && \text{Lemma 3.2} \\ &= O\left(\frac{\log n}{\eta}\right) + \sum_{t \in [T-1]} \left( O(\eta^2) \cdot \|\ell_x^t - \ell_x^{t-1}\|_\infty - \frac{1}{4\eta} \cdot \|\ell_x^t - \ell_x^{t-1}\|_\infty^2 \right) \\ &\leq O\left(\frac{\log n}{\eta}\right) + T \cdot O(\eta^5) = O\left(T^{1/6} \log^{5/6} n\right). \end{aligned}$$

145 This finishes the proof of the theorem. □

146 **4 Lower Bounds for Hedge in Two-Player Games**

147 We prove lower bounds for regrets of players when they both run the vanilla Hedge algorithm. We  
 148 show that even in games with two actions, vanilla Hedge cannot perform asymptotically better than  
 149 its guaranteed regret bound of  $O(\sqrt{T})$  under the adversarial setting.

150 **Theorem 4.1.** *Suppose two players run the vanilla Hedge algorithm to play a two-action game with*  
 151 *initial strategy  $(0.4, 0.6)$ . Then for any sufficiently large  $T$  and any learning rate  $\eta > 0$ , there is a*  
 152 *game such that at least one player has regret  $\Omega(\sqrt{T})$  after  $T'$  rounds for some  $T' \in [T : T + \sqrt{T}]$ .*

153 **Remark 4.2.** *Theorem 4.1 shows that even if players have a good estimation about the number of*  
 154 *rounds to play (i.e., between  $T$  and  $T + \sqrt{T}$ ), vanilla Hedge with any learning rate  $\eta(T) > 0$  picked*  
 155 *using  $T$  cannot promise to achieve a regret bound that is asymptotically lower than  $O(\sqrt{T})$  for every*  
 156 *round  $T' \in [T : T + \sqrt{T}]$ . We would like to point out that the use of  $(0.4, 0.6)$  as the initial strategy*  
 157 *instead of the uniform distribution is not crucial but only to simplify the construction and analysis.*

158 Let  $T$  be a sufficiently large integer. We will use three games  $G_i = (A, B_i)$ ,  $i \in \{1, 2, 3\}$ , to handle  
 159 three cases of the learning rate  $\eta$ , where

$$A = \begin{pmatrix} 1 & -1 \\ -1 & 1 \end{pmatrix}, \quad B_1 = \begin{pmatrix} -1 & 1 \\ 1 & -1 \end{pmatrix}, \quad B_2 = \begin{pmatrix} 1 & 1 \\ 1 & 1 \end{pmatrix} \quad \text{and} \quad B_3 = \begin{pmatrix} 1 & -1 \\ -1 & 1 \end{pmatrix}.$$

160 We use  $G_2$  to handle the case when  $\eta \leq 64/(c_0\sqrt{T})$  (see Appendix B.1) where  $c_0 \in (0, 1]$  is a  
 161 constant introduced below in Lemma 4.3. We use  $G_3$  to handle the case when  $\eta \geq 3$  (see Appendix  
 162 B.2). The most intriguing case is when the learning rate  $\eta$  is between  $64/(c_0\sqrt{T})$  and 3. For this case  
 163 we use the Matching Pennies game  $G_1 = (A, B_1)$ .

164 Let  $x^t$  and  $y^t$  denote strategies played in round  $t$  by the first and second players, respectively. Let  
 165  $x^* = y^* = (0.5, 0.5)$ . The proof for this case relies on the following lemma, which shows that the  
 166 KL divergence between  $(x^*, y^*)$  and  $(x^T, y^T)$  after  $T$  rounds is at least  $\Omega(\sqrt{T}\eta)$ .

**Lemma 4.3.** *Suppose players run vanilla Hedge for  $T$  rounds with  $\eta : 16/\sqrt{T} \leq \eta \leq 3$ . Then*

$$D_{KL}(x^* \| x^T) + D_{KL}(y^* \| y^T) \geq c_0\sqrt{T}\eta, \quad \text{for some constant } c_0 \in (0, 1].$$

167 We are now ready to prove Theorem 4.1 for the main case when  $64/(c_0\sqrt{T}) \leq \eta \leq 3$ .

168 *Proof of Theorem 4.1 for the main case.* For convenience we let  $x_t = x^t(1)$  (or  $y_t = y^t(1)$ ) denote  
 169 the probability of playing the first action in  $x^t$  (or  $y^t$ , respectively). We first describe the high level  
 170 idea behind the proof. Since we know the KL divergence is at least  $c_0\sqrt{T}\eta$  at time  $T$  by Lemma 4.3,  
 171 at least one of  $x_T$  and  $y_T$  is extremely close to either 0 or 1. Assume without loss of generality that  
 172 this is the case for  $x_T$ . As a result, the probability of the first player playing the first action will not  
 173 change much for the next  $\sqrt{T}$  rounds. Consequently, during the next  $\sqrt{T}$  rounds, one of the players  
 174 must keep losing and the other player will keep winning. This can be used to show that one of the  
 175 two players must have regret at least  $\Omega(\sqrt{T})$  at some point  $T'$  between  $T$  and  $T + \sqrt{T}$ .

To make this more formal, let  $\ell_x^t$  (or  $\ell_y^t$ ) denote the cost vector of the first (or the second) player at  
 round  $t$  and define  $L_x^t$  and  $L_y^t$  to be the total loss up to round  $t$  of the two players:

$$L_x^t = \sum_{\tau \in [t]} \langle x^\tau, \ell_x^\tau \rangle \quad \text{and} \quad L_y^t = \sum_{\tau \in [t]} \langle y^\tau, \ell_y^\tau \rangle.$$

Since  $G_1 = (A, B_1)$  is zero-sum, we have  $\langle x^\tau, \ell_x^\tau \rangle + \langle y^\tau, \ell_y^\tau \rangle = 0$  and thus,  $L_x^t + L_y^t = 0$ . Moreover,  
 noting that the sum of two rows of  $A$  is zero, the first player can always guarantee an overall loss  
 of at most 0 when playing the best fixed action in hindsight. Therefore,  $\text{regret}_t^x \geq L_x^t$  and similarly  
 $\text{regret}_t^y \geq L_y^t$ . Combining this with  $L_x^t + L_y^t = 0$ , we have

$$\max \left\{ \text{regret}_t^x, \text{regret}_t^y \right\} \geq |L_x^t| = |L_y^t|.$$

176 To finish the proof, it suffices to show that

$$|L_x^{T'}| = |L_y^{T'}| \geq \Omega(\sqrt{T}), \quad \text{for some } T' \in [T : T + \sqrt{T}]. \quad (7)$$

Let  $L = c_0\sqrt{T}/8 \leq \sqrt{T}$ . We have from Lemma 4.3 that the KL divergence is at least  $c_0\sqrt{T}\eta$  (using  $\eta \geq 64/(c_0\sqrt{T}) > 16/\sqrt{T}$ ). We assume without loss of generality that  $D_{\text{KL}}(x^* \| x^T) \geq c_0\sqrt{T}\eta/2$ . We further assume without loss of generality that the second term is larger:

$$\frac{1}{2} \cdot \log \frac{1}{2(1-x_T)} \geq \frac{c_0\sqrt{T}\eta}{4}.$$

177 It follows that  $x_T$  is very close to 1:  $x_T \geq 1 - \exp(-c_0\sqrt{T}\eta/2)$ , and we use this to show that  $x_{T+\tau}$   
178 remains close to 1 for all  $\tau \in [L]$ . To see this is the case, we note that

$$\frac{x_{T+\tau}}{1-x_{T+\tau}} \geq \exp(-2\eta\tau) \cdot \frac{x_T}{1-x_T} \geq \frac{1}{2} \cdot \exp\left(-2\eta L + \frac{c_0\sqrt{T}\eta}{2}\right) = \frac{1}{2} \cdot \exp\left(\frac{c_0\sqrt{T}\eta}{4}\right) \geq 3,$$

179 where we used  $\eta \geq 64/(c_0\sqrt{T})$  in the last inequality. This implies  $x_{T+\tau} \geq 3/4$  for all  $\tau \in [L]$ .

Now we turn our attention to the second player. Given that  $x_{T+\tau} \geq 3/4$  for all  $\tau \in [L]$ ,  $y_{T+\tau}$  keeps growing for all  $\tau \in [L]$ . As a result there is an interval  $I \subseteq [L]$  such that (i) every  $y_{T+\tau}$ ,  $\tau \in I$ , lies between  $1/4$  and  $3/4$ ; (ii) every  $y_{T+\tau}$  before  $I$  is smaller than  $1/4$ ; and (iii) every  $y_{T+\tau}$  after  $I$  is larger than  $3/4$ . Using a similar argument, we show that  $I$  cannot be too long. Letting  $\ell$  and  $r$  be the left and right endpoints of  $I$ , we have

$$3 \geq \frac{y_r}{1-y_r} \geq \exp\left(\frac{\eta(r-\ell)}{2}\right) \cdot \frac{y_\ell}{1-y_\ell} \geq \exp\left(\frac{\eta(r-\ell)}{2}\right) \cdot \frac{1}{3}.$$

180 As a result, we have  $(r-\ell) \leq 6/\eta \leq (3/32) \cdot c_0\sqrt{T}$  and thus, either (i) or (ii) is of length at least  
181  $\Omega(L)$ . We focus on the case when (ii) is long; the other case can be handled similarly.

182 Summarizing what we have so far, there is an interval  $J = [\alpha : \beta] \subseteq [L]$  of length  $\Omega(L)$  such that for  
183 every  $\tau \in J$ , both  $x_{T+\tau}$  and  $y_{T+\tau}$  are at least  $3/4$ . This implies that the total loss of the first player  
184 grows by  $\Omega(1)$  each round and thus,  $L_x^{T+\beta} - L_x^{T+\alpha} \geq \Omega(L)$ . Therefore, either  $|L_x^{T+\alpha}| \geq \Omega(L)$  or  
185  $|L_x^{T+\beta}| \geq \Omega(L)$ . This finishes the proof of (7) using  $L = \Omega(\sqrt{T})$  and the proof of the theorem.  $\square$

## 186 5 Faster Convergence of Swap Regrets

187 Under the adversarial online model, Blum and Mansour [6] gave a black-box reduction showing  
188 that any algorithm that achieve good regrets can be converted into an algorithm that achieves good  
189 swap regrets. In this section we show that if every player in a repeated game runs their algorithm  
190 with optimistic Hedge as its core, then the swap regret of each player can be bounded from above by  
191  $O((n \log n)^{3/4}(mT)^{1/4})$ , where  $m$  is the number of players and  $n$  is the number of actions.

192 We start with an overview on the reduction framework of [6], which we will refer to as the BM  
193 algorithm. Let  $S = [n]$  be the set of available actions. Given an algorithm  $\text{ALG}$  that achieves good  
194 regrets, the BM algorithm instantiates  $n$  copies  $\text{ALG}_1, \dots, \text{ALG}_n$  of  $\text{ALG}$  over  $S$ . At the beginning of  
195 each round  $t = 1, \dots, T$ , the BM algorithm receives a distribution  $q_i^t$  over  $S$  from  $\text{ALG}_i$  for each  
196  $i \in [n]$ , and plays  $x^t$ , which is the unique distribution over  $S$  that satisfies  $x^t = x^t Q^t$ , where  $Q^t$  is  
197 the  $n \times n$  matrix with row vectors  $q_1^t, \dots, q_n^t$ . After receiving the loss vector  $\ell^t$ , the BM algorithm  
198 experiences a loss of  $\langle x^t, \ell^t \rangle$  and distributes  $x^t(i) \cdot \ell^t$  to  $\text{ALG}_i$  as its loss vector in round  $t$ .

199 We are now ready to state our main theorem of this section:

200 **Theorem 5.1.** *Suppose that every player in a repeated game runs the BM algorithm with optimistic*  
201 *Hedge as ALG and sets the learning rate of the latter to be  $\eta = (n \log n / (m^2 T))^{1/4}$ . Then the swap*  
202 *regret of each player is  $O((n \log n)^{3/4} \cdot (m^2 T)^{1/4})$ .*

203 For convenience we refer to the BM algorithm with optimistic Hedge as **BM-Optimistic-Hedge**  
204 in the rest of the section. We first combine the analysis of [6] for the BM algorithm and Lemma 3  
205 to obtain the following bound for the swap regret of **BM-Optimistic-Hedge** under the adversarial  
206 setting, in terms of the total path length of cost vectors the player's mixed strategies:

207 **Lemma 5.2.** *Suppose that a player runs **BM-Optimistic-Hedge** with  $\eta > 0$  for  $T$  rounds. Then*

$$\text{swap-regret}_T \leq \frac{2n \log n}{\eta} + 2\eta \left( \sum_{t=2}^T \|x^t - x^{t-1}\|_1^2 + \sum_{t=1}^T \|\ell^t - \ell^{t-1}\|_\infty^2 \right), \quad \text{where } \ell^0 = \mathbf{0}.$$

$$Q = \begin{pmatrix} 1 - \epsilon & \epsilon \\ \epsilon' & 1 - \epsilon' \end{pmatrix} \quad x = \begin{pmatrix} \frac{1}{k+1} & \frac{k}{k+1} \end{pmatrix} \quad \text{vs} \quad Q = \begin{pmatrix} 1 - \epsilon' & \epsilon' \\ \epsilon & 1 - \epsilon \end{pmatrix} \quad x = \begin{pmatrix} \frac{k}{k+1} & \frac{1}{k+1} \end{pmatrix}$$

Figure 1: Let  $\epsilon' = \epsilon/k$ . Additive perturbations may change the stationary distribution dramatically.

The proof can be found in Appendix C.1. For the repeated game setting, we have for each  $t \geq 2$ ,

$$\|\ell_i^t - \ell_i^{t-1}\|_\infty \leq \|\mathbf{x}_{-i}^t - \mathbf{x}_{-i}^{t-1}\|_1 \leq \sum_{j \neq i} \|\mathbf{x}_j^t - \mathbf{x}_j^{t-1}\|_1$$

208 where the last inequality used the fact that both  $\mathbf{x}_{-i}^t$  and  $\mathbf{x}_{-i}^{t-1}$  are product distributions. Combining it  
209 with Lemma 5.2, we can bound the swap regret of each player  $i \in [m]$  in the game by

$$\text{swap-regret}_T^i \leq \frac{2n \log n}{\eta} + 2\eta + 2\eta m \sum_{j \in [m]} \sum_{t=2}^T \|x_j^t - x_j^{t-1}\|_1^2. \quad (8)$$

210 We prove the following main technical lemma in the rest of the section, which states that the mixed  
211 strategy  $x^t$  produced by `BM-Optimistic-Hedge` under the adversarial setting moves very slowly  
212 (by at most  $O(\eta)$  in  $\ell_1$ -distance each round). Theorem 5.1 follows by combining Lemma 5.2 and 5.3.

213 **Lemma 5.3.** *Suppose that a player runs `BM-Optimistic-Hedge` with rate  $\eta : 0 < \eta \leq 1/6$  under  
214 the adversarial setting. Then we have  $\|x^t - x^{t-1}\|_1 \leq O(\eta)$  for all  $t \geq 2$ .*

215 *Proof of Theorem 5.1 Assuming Lemma 5.3.* Let  $\eta = (n \log n)^{1/4} (m^2 T)^{-1/4}$ . For the special case  
216 when  $\eta > 1/6$ , the swap regret of each player is trivially at most  $T = O((n \log n)^{3/4} \cdot (m^2 T)^{1/4})$ .  
217 Assuming  $\eta \leq 1/6$ , by Lemma 5.2 we have from (8) that

$$\text{swap-regret}_T^i \leq \frac{2n \log n}{\eta} + 2\eta + 2\eta m^2 T \cdot O(\eta^2) = O\left((n \log n)^{3/4} \cdot (m^2 T)^{1/4}\right).$$

218 This finishes the proof of the theorem. □

219 The proof of Lemma 5.3 can be found in Appendix C.2. Here we give a high-level description of its  
220 proof. Given that `BM-Optimistic-Hedge` runs  $n$  copies of optimistic Hedge with rate  $\eta$ , we know  
221 that mixed strategies proposed by each `ALGi` move very slowly:  $\|q_i^t - q_i^{t-1}\|_1 \leq O(\eta)$ . However,  
222 it is not clear whether this translates into a similar property for  $x^t$  since the latter is obtained by  
223 solving  $x^t = x^t Q^t$ . Equivalently,  $x^t$  can be viewed as the stationary distribution of the Markov  
224 chain  $Q^t$  composed by strategies of each individual expert `ALGi`, and its dependency on  $Q^t$  is highly  
225 nonlinear. While there is a vast literature on the perturbation analysis of Markov chains, many results  
226 require additional assumptions on the underlying Markov chain (e.g. bounded eigenvalue gap) and  
227 are not well suited for our setting here. Indeed, it is easy to come up with examples showing that the  
228 stationary distribution is extremely sensitive to small *additive* perturbations (see Figure 1). As a result  
229 one cannot hope to prove Lemma 5.3 based on the property  $\|q_i^t - q_i^{t-1}\|_1 \leq O(\eta)$  only.

230 We circumvent this difficulty by noting that optimistic Hedge only incurs small *multiplicative* pertur-  
231 bations on the Markov chain (see Claim C.5), i.e., each entry of  $Q^t$  differs from the corresponding  
232 entry of  $Q^{t-1}$  by no more than a small multiplicative factor of the latter. We present in Lemma C.2  
233 an analysis on stationary distributions of Markov chains under multiplicative perturbations, based on  
234 the classical Markov chain tree theorem, and then use it to prove Lemma 5.3.

235 We further prove that one can design a wrapper for `BM-Optimistic-Hedge` that is robust against  
236 adversarial opponents:

237 **Corollary 5.4.** *There is an algorithm `BM-Optimistic-Hedge*` with the following guarantee. If all  
238 players run `BM-Optimistic-Hedge*`, then the swap regret of each individual is  $\tilde{O}(n^{3/4} (m^2 T)^{1/4})$ ;  
239 if the player is facing adversaries, then the swap regret is still at most  $\tilde{O}((nT)^{1/2} + n^{3/4} (m^2 T)^{1/4})$ .*

240 The proof is similar to Corollary 16 in [27]; we present it in Appendix C.3 for completeness.

241 In the appendix we give two more extensions to our results on swap regrets.

- 242 1. In Appendix D, we show that incorporating optimistic Hedge into a folklore algorithm  
243 from [7] can also achieve faster convergence of swap regrets, with a slightly worse  
244 dependence on  $n$ . Interestingly, our analysis of this algorithm also crucially relies on the  
245 perturbation analysis of stationary distributions of Markov chains.
- 246 2. In Appendix E, we study the convergence to the approximately optimal social welfare  
247 (following the definition in [14]) with no-swap regret algorithms, and prove that  $O(1/T)$   
248 holds for a wide range of no-swap regret algorithms.

## 249 6 Discussion

250 In this paper, we studied the convergence rate of regrets of the Hedge algorithm and its optimistic  
251 variant in two-player games. We obtained a strict separation between vanilla Hedge and optimistic  
252 Hedge, i.e.,  $1/\sqrt{T}$  vs.  $1/T^{5/6}$ . We also initiated the study on algorithms with faster convergence  
253 rates of swap regrets in general multiplayer games and obtained an algorithm with average regret  
254  $O(m^{1/2}(n \log n/T)^{3/4})$ , improving over the classic result of Blum and Mansour [6].

255 Our work led to several interesting future directions:

- 256 • Our faster convergence result for optimistic Hedge currently only works for two-player  
257 games. Can we extend it to multiplayer games? Second, what is the optimal convergence  
258 rate for optimistic Hedge and other no-regret algorithms? even for two-player games?
- 259 • Regarding swap regrets, it is easy to generalize the result in Section 5 to any algorithm that  
260 (1) satisfies the RVU property and (2) makes only multiplicative changes on strategies each  
261 iteration. These include optimistic Hedge and optimistic multiplicative weights. However,  
262 our current analysis does not apply to general optimistic Mirror Descent or Follow the  
263 Regularized Leader. Can we still prove faster convergence of swap regrets via the reduction  
264 of [6] without requiring (2) on the regret minimization algorithm? or does there exist some  
265 natural gap between these algorithms and optimistic Hedge/multiplicative weights?
- 266 • For our result in Appendix E on the convergence to the approximately optimal social  
267 welfare, can this fast convergence result be extended to the (exact) optimal social welfare  
268 setting (follow the definition in [27])?
- 269 • Can we achieve similar convergence rates under partial information models? such as those  
270 considered in [24, 14, 29].



271 **References**

- 272 [1] Venkat Anantharam and Pantelis Tsoucas. A proof of the markov chain tree theorem. *Statistics*  
273 *& Probability Letters*, 8(2):189–192, 1989.
- 274 [2] Sanjeev Arora, Elad Hazan, and Satyen Kale. The multiplicative weights update method: a  
275 meta-algorithm and applications. *Theory of Computing*, 8(1):121–164, 2012.
- 276 [3] R.J. Aumann. Subjectivity and correlation in randomized strategies. *Journal of Mathematical*  
277 *Economics*, 1:67–96, 1974.
- 278 [4] James Bailey and Georgios Piliouras. Fast and furious learning in zero-sum games: vanishing  
279 regret with non-vanishing step sizes. In *Advances in Neural Information Processing Systems*,  
280 pages 12977–12987, 2019.
- 281 [5] James P Bailey and Georgios Piliouras. Multiplicative weights update in zero-sum games. In  
282 *Proceedings of the 2018 ACM Conference on Economics and Computation*, pages 321–338,  
283 2018.
- 284 [6] Avrim Blum and Yishay Mansour. From external to internal regret. *Journal of Machine Learning*  
285 *Research*, 8(Jun):1307–1324, 2007.
- 286 [7] Nicolo Cesa-Bianchi and Gábor Lugosi. *Prediction, learning, and games*. Cambridge university  
287 press, 2006.
- 288 [8] Yun Kuen Cheung and Georgios Piliouras. Vortices instead of equilibria in minmax optimization:  
289 Chaos and butterfly effects of online learning in zero-sum games. In *Conference on Learning*  
290 *Theory*, pages 807–834, 2019.
- 291 [9] Constantinos Daskalakis, Alan Deckelbaum, and Anthony Kim. Near-optimal no-regret algo-  
292 rithms for zero-sum games. In *Proceedings of the twenty-second annual ACM-SIAM symposium*  
293 *on Discrete Algorithms*, pages 235–254. SIAM, 2011.
- 294 [10] Constantinos Daskalakis, Andrew Ilyas, Vasilis Syrgkanis, and Haoyang Zeng. Training gans  
295 with optimism. In *International Conference on Learning Representations*, 2018.
- 296 [11] Constantinos Daskalakis and Ioannis Panageas. Last-iterate convergence: Zero-sum games and  
297 constrained min-max optimization. *arXiv preprint arXiv:1807.04252*, 2018.
- 298 [12] Dean P Foster and Rakesh Vohra. Regret in the on-line decision problem. *Games and Economic*  
299 *Behavior*, 29(1-2):7–35, 1999.
- 300 [13] Dean P Foster and Rakesh V Vohra. Calibrated learning and correlated equilibrium. *Games and*  
301 *Economic Behavior*, 21(1-2):40, 1997.
- 302 [14] Dylan J Foster, Zhiyuan Li, Thodoris Lykouris, Karthik Sridharan, and Eva Tardos. Learning in  
303 games: Robustness of fast convergence. In *Advances in Neural Information Processing Systems*,  
304 pages 4734–4742, 2016.
- 305 [15] Yoav Freund and Robert E Schapire. Game theory, on-line prediction and boosting. In  
306 *Proceedings of the ninth annual conference on Computational learning theory*, pages 325–332,  
307 1996.
- 308 [16] Yoav Freund and Robert E. Schapire. *J. Comput. System Sci.*, 55(1):119–139, 1997.
- 309 [17] Amy Greenwald, Zheng Li, and Warren Schudy. More efficient internal-regret-minimizing  
310 algorithms. In *COLT*, pages 239–250, 2008.
- 311 [18] Sergiu Hart and Andreu Mas-Colell. A simple adaptive procedure leading to correlated equilib-  
312 rium. *Econometrica*, 68(5):1127–1150, 2000.
- 313 [19] Elad Hazan. Introduction to online convex optimization. *Foundations and Trends in Optimiza-*  
314 *tion*, 2(3-4):157–325, 2016.
- 315 [20] Adam Kalai and Santosh Vempala. Efficient algorithms for online decision problems. *Journal*  
316 *of Computer and System Sciences*, 71(3):291–307, 2005.
- 317 [21] Panayotis Mertikopoulos, Christos Papadimitriou, and Georgios Piliouras. Cycles in adversarial  
318 regularized learning. In *Proceedings of the Twenty-Ninth Annual ACM-SIAM Symposium on*  
319 *Discrete Algorithms*, pages 2703–2717. SIAM, 2018.
- 320 [22] Noam Nisan, Tim Roughgarden, Eva Tardos, and Vijay V Vazirani. *Algorithmic Game Theory*.  
321 Cambridge University Press, 2007.

- 322 [23] Alexander Rakhlin and Karthik Sridharan. Online learning with predictable sequences. In  
323 *Conference on Learning Theory*, pages 993–1019, 2013.
- 324 [24] Sasha Rakhlin and Karthik Sridharan. Optimization, learning, and games with predictable  
325 sequences. In *Advances in Neural Information Processing Systems*, pages 3066–3074, 2013.
- 326 [25] Tim Roughgarden. Intrinsic robustness of the price of anarchy. *Journal of the ACM (JACM)*,  
327 62(5):1–42, 2015.
- 328 [26] Shai Shalev-Shwartz et al. Online learning and online convex optimization. *Foundations and  
329 trends in Machine Learning*, 4(2):107–194, 2011.
- 330 [27] Vasilis Syrgkanis, Alekh Agarwal, Haipeng Luo, and Robert E Schapire. Fast convergence of  
331 regularized learning in games. In *Advances in Neural Information Processing Systems*, pages  
332 2989–2997, 2015.
- 333 [28] Jun-Kun Wang and Jacob D Abernethy. Acceleration through optimistic no-regret dynamics. In  
334 *Advances in Neural Information Processing Systems*, pages 3824–3834, 2018.
- 335 [29] Chen-Yu Wei and Haipeng Luo. More adaptive algorithms for adversarial bandits. In *Conference  
336 On Learning Theory*, pages 1263–1291, 2018.
- 337 [30] Martin Zinkevich. Online convex programming and generalized infinitesimal gradient ascent. In  
338 *Proceedings of the 20th international conference on machine learning (icml-03)*, pages 928–936,  
339 2003.

340 **A Missing proof from Section 3**

341 **Proof of Lemma 3.2** For each  $t \in [2 : T]$ , we apply Pinsker's inequality to have

$$\begin{aligned}
\frac{1}{2} \cdot \|x^t - x^{t-1}\|_1^2 &\leq D_{\text{KL}}(x^{t-1} \| x^t) = \sum_{i \in [n]} x^{t-1}(i) \cdot \log \left( \frac{x^{t-1}(i)}{x^t(i)} \right) \\
&= \sum_{i \in [n]} x^{t-1}(i) \cdot \log \left( \sum_{j \in [n]} \exp(-\eta(2\ell^{t-1}(j) - \ell^{t-2}(j))) \cdot x^{t-1}(j) \right) \\
&\quad + \sum_{i \in [n]} x^{t-1}(i) \cdot \eta(2\ell^{t-1}(i) - \ell^{t-2}(i)) \\
&= \log \left( \sum_{j \in [n]} \exp(-\eta(2\ell^{t-1}(j) - \ell^{t-2}(j))) \cdot x^{t-1}(j) \right) + \eta \langle x^{t-1}, 2\ell^{t-1} - \ell^{t-2} \rangle \\
&\triangleq \Phi_t + \eta \langle x^{t-1}, 2\ell^{t-1} - \ell^{t-2} \rangle, \tag{9}
\end{aligned}$$

342 where we recall  $\ell^0 = \mathbf{0}$ . The third step follows from the updating rule of optimistic Hedge. Letting  
343  $L^t = \sum_{i \in [t]} \ell^i$ , next we use induction to prove the following claim for each  $k = 1, \dots, T$ :

$$\sum_{t \in [k]} \Phi_t = \log \left( \sum_{j \in [n]} x^1(j) \cdot \exp(-\eta L^{k-1}(j) - \eta \ell^{k-1}(j)) \right). \tag{10}$$

344 The base case holds trivially, as  $\Phi_1 = 0$ . Suppose the above holds for  $k$ . Then for  $k + 1$  we have

$$\begin{aligned}
\sum_{t=1}^{k+1} \Phi_t &= \sum_{t=1}^k \Phi_t + \Phi_{k+1} \\
&= \log \left( \sum_{j \in [n]} x^1(j) \cdot \exp(-\eta L^{k-1}(j) - \eta \ell^{k-1}(j)) \right) + \log \left( \sum_{i \in [n]} \exp(-\eta(2\ell^k(i) - \ell^{k-1}(i))) \cdot x^k(i) \right) \\
&= \log \left( \left( \sum_{i \in [n]} \exp(-\eta(2\ell^k(i) - \ell^{k-1}(i))) \cdot x^k(i) \right) \cdot \left( \sum_{j \in [n]} x^1(j) \cdot \exp(-\eta L^{k-1}(j) - \eta \ell^{k-1}(j)) \right) \right) \\
&= \log \left( \sum_{i \in [n]} \exp(-\eta(2\ell^k(i) - \ell^{k-1}(i))) \cdot x^1(i) \cdot \exp(-\eta L^{k-1}(i) - \eta \ell^{k-1}(i)) \right) \\
&= \log \left( \sum_{i \in [n]} x^1(i) \cdot \exp(-\eta L^k(i) - \eta \ell^k(i)) \right),
\end{aligned}$$

345 where the third step follows from

$$x^k(i) = \frac{x^1(i) \cdot \exp(-\eta L^{k-1}(i) - \eta \ell^{k-1}(i))}{\sum_{j \in [n]} x^1(j) \cdot \exp(-\eta L^{k-1}(j) - \eta \ell^{k-1}(j))}.$$

346 Now we have (recall that  $\Phi_1 = 0$ )

$$\begin{aligned}
\frac{1}{2 \ln 2} \sum_{t \in [2:T]} \|x^t - x^{t-1}\|_1^2 &\leq \sum_{t \in [2:T]} \left( \Phi_t + \eta \langle x^{t-1}, 2\ell^{t-1} - \ell^{t-2} \rangle \right) \\
&= \log \left( \sum_{j \in [n]} \frac{1}{n} \cdot \exp(-\eta L^{T-1}(j) - \eta \ell^{T-1}(j)) \right) + \sum_{t \in [2:T]} \eta \langle x^{t-1}, 2\ell^{t-1} - \ell^{t-2} \rangle \\
&\leq -\min_{j \in [n]} \left( \eta L^{T-1}(j) + \eta \ell^{T-1}(j) \right) + \sum_{t \in [2:T]} \eta \langle x^{t-1}, 2\ell^{t-1} - \ell^{t-2} \rangle \\
&\leq -\eta \min_{j \in [n]} L^{T-1}(j) + \eta \sum_{t \in [T-1]} \langle x^t, \ell^t \rangle + \eta \sum_{t \in [T-1]} \langle x^t, \ell^t - \ell^{t-1} \rangle \\
&\leq \eta \left( \frac{2 \log n}{\eta} + \eta \sum_{t \in [T-1]} \|\ell^t - \ell^{t-1}\|_\infty^2 \right) + \eta \sum_{t \in [T-1]} \langle x^t, \ell^t - \ell^{t-1} \rangle \\
&\leq 2 \log n + \eta^2 \sum_{t \in [T-1]} \|\ell^t - \ell^{t-1}\|_\infty^2 + \eta \sum_{t \in [T-1]} \|\ell^t - \ell^{t-1}\|_\infty \\
&\leq 2 \log n + (\eta + \eta^2) \sum_{t \in [T-1]} \|\ell^t - \ell^{t-1}\|_\infty.
\end{aligned}$$

347 The first step follows from Eq. (9) and the second step follows from Eq. (10). The fifth step follows  
348 from Lemma 2.1. This finishes the proof of the lemma.

## 349 B Missing proof from Section 4

### 350 B.1 Case when the learning rate is small

351 We handle the case when  $\eta \leq 64/(c_0\sqrt{T}) = O(1/\sqrt{T})$  with the following lemma:

352 **Lemma B.1.** *Suppose both players run vanilla Hedge on game  $G_2 = (A, B_2)$  with learning rate*  
353  *$\eta = O(1/\sqrt{T})$ . Then the regret of the first player is at least  $\Omega(\sqrt{T})$  after  $T$  rounds.*

354 *Proof.* The loss of player 2 is invariant to the strategy of player 1. Thus her strategy stays at  $(0.4, 0.6)$ .  
355 Hence, for any  $t \in [T]$ , the loss for player 1 is always  $\ell = (-0.2, 0.2)$  and we have

$$\begin{aligned}
x^t(1) &= \frac{0.4 \cdot \exp(0.2\eta t)}{0.4 \cdot \exp(0.2\eta t) + 0.6 \cdot \exp(-0.2\eta t)} \quad \text{and} \\
x^t(2) &= \frac{0.6 \cdot \exp(-0.2\eta t)}{0.4 \cdot \exp(0.2\eta t) + 0.6 \cdot \exp(-0.2\eta t)}.
\end{aligned}$$

356 One can verify that when  $t \leq 1/2\eta$ , we have  $x^t(1) \leq 0.5 \leq x^t(2)$ . Therefore, the regret is

$$\text{regret}_T^x = \sum_{t \in [T]} \langle x^t, \ell \rangle - \sum_{t \in [T]} \ell(1) \geq \sum_{t=1}^{1/2\eta} \langle x^t, \ell \rangle - \sum_{t=1}^{1/2\eta} \ell(1) \geq 0 + \frac{1}{2\eta} \cdot 0.2 = \Omega(\sqrt{T}).$$

357 Thus we complete the proof. □

### 358 B.2 Case when the learning rate is large

359 We next work on the case when  $\eta \geq 3$ . Recall that we write  $x_t = x^t(1)$  and  $y_t = y^t(1)$ .

360 **Lemma B.2.** *Suppose both players run vanilla Hedge on game  $G_3 = (A, B_3)$  with learning rate*  
361  *$\eta \geq 3$  Then the regret of the first player is at least  $\Omega(T)$  after  $T$  rounds.*

362 *Proof.* Intuitively,  $(A, B_3)$  is a cooperation game, and it is beneficial for both players if they choose  
 363 to cooperate on one single action (by playing either  $(1, 2)$  or  $(2, 1)$ ). However, when the learning rate  
 364 is too large, they actually mismatch in every iterations. Formally, we have

$$\begin{aligned} x_{t+1} &= \frac{x_t \cdot \exp(\eta(1 - 2y_t))}{x_t \cdot \exp(\eta(1 - 2y_t)) + (1 - x_t) \cdot \exp(\eta(2y_t - 1))} \\ &= \frac{x_t \cdot \exp(\eta(1 - 2x_t))}{x_t \cdot \exp(\eta(1 - 2x_t)) + (1 - x_t) \cdot \exp(\eta(2x_t - 1))}. \end{aligned}$$

365 The second step follows from  $x_t = y_t$  for all  $t$  because  $A = B_3$  in the game. Motivated by this, we  
 366 define a sequence  $a_0, a_1, \dots$  where  $a_0 = x_0 = 0.4$  and

$$a_{t+1} = \frac{(1 - a_t) \cdot \exp(\eta(2a_t - 1))}{a_t \cdot \exp(\eta(1 - 2a_t)) + (1 - a_t) \cdot \exp(\eta(2a_t - 1))}, \quad \text{for each } t \geq 0.$$

367 Then  $a_t = x_t$  if  $t$  is even and  $a_t = 1 - x_t$  when  $t$  is odd. Furthermore, by Claim B.3 below, we have  
 368  $\eta \exp(-2\eta) \leq a_t \leq 0.4$  for all  $t$  when  $\eta \geq 3$ . Hence, we have

$$\text{regret}_T^x \geq \sum_{t \in [T]} \langle x^t, \ell_x^t \rangle = \sum_{t \in [T]} (2x_t - 1)^2 = \sum_{t \in [T]} (2a_t - 1)^2 \geq \Omega(T).$$

369 This finishes the proof of the lemma. □

370 **Claim B.3.** When  $\eta \geq 3$ , we have  $\eta \exp(-2\eta) \leq a_t \leq 0.4$  for all  $t \geq 0$ .

371 *Proof.* We prove by induction on  $t$ . The base case holds trivially for  $t = 0$ . Suppose the inequality  
 372 holds up to  $t$ . Then for  $t + 1$ , we have

$$\frac{a_{t+1}}{1 - a_{t+1}} = \frac{1 - a_t}{a_t} \cdot \exp(\eta(4a_t - 2)) \triangleq f(a_t).$$

373 By simple calculation, we know that  $f(a_t)$  takes maximum at  $\eta \exp(-2\eta)$  or 0.4. Thus,

$$\frac{a_{t+1}}{1 - a_{t+1}} \leq \max \left\{ f(0.4), f(\eta \exp(-2\eta)) \right\} \leq \frac{2}{3},$$

374 which implies that  $a_{t+1} \leq 0.4$ . The second step above follows from

$$f(0.4) = \frac{3}{2} \cdot \exp(-0.4\eta) \leq \frac{2}{3},$$

375 using  $\eta \geq 3$  and

$$f(\eta \exp(-2\eta)) \leq \frac{1}{\eta} \exp(2\eta) \cdot \exp(4\eta^2 \exp(-2\eta) - 2\eta) = \frac{1}{\eta} \cdot \exp(4\eta^2 \exp(-2\eta)) \leq \frac{2}{3}.$$

376 Moreover,  $f(a_t)$  takes minimum at the smaller solution  $a$  of  $4\eta a(1 - a) = 1$ . Thus,

$$\frac{a_{t+1}}{1 - a_{t+1}} \geq \frac{1 - a}{a} \cdot \exp(\eta(4a - 2)) \geq \frac{4}{3} \cdot \eta \exp(-2\eta),$$

377 where the second step used  $\exp(\eta(4a - 2)) \geq \exp(-2\eta)$ ,  $a \leq 1/2\eta$  and  $a \leq 1/3$ . This shows that  
 378  $a_{t+1} \geq \eta \exp(-2\eta)$  using  $\eta \geq 3$ , and finishes the induction. □

### 379 B.3 Proof of Lemma 4.3

380 Note that the Matching Pennies game  $G_1 = (A, B_1)$  is zero-sum. It is known (see [5]) that the KL  
 381 divergence of vanilla Hedge in zero-sum games is strictly increasing. We give a careful analysis on  
 382 its increment each round when playing  $G_1$ . (Recall that  $x^* = y^* = (0.5, 0.5)$ .)

383 **Lemma B.4.** Suppose both players run vanilla Hedge with  $\eta \leq 3$  on  $G_1$ . Then for each  $t \geq 0$ ,

$$\begin{aligned} &D_{KL}(x^* \| x^{t+1}) + D_{KL}(y^* \| y^{t+1}) - (D_{KL}(x^* \| x^t) + D_{KL}(y^* \| y^t)) \\ &\geq e^{-7} \eta^2 x_t (1 - x_t) (2y_t - 1)^2 + e^{-7} \eta^2 y_t (1 - y_t) (2x_t - 1)^2. \end{aligned}$$

384 *Proof.* Focusing on the first player, we have

$$\begin{aligned}
& D_{\text{KL}}(x^* \| x^{t+1}) - D_{\text{KL}}(x^* \| x^t) \\
&= \sum_{i \in [2]} x^*(i) \cdot \log \left( \frac{x^*(i)}{x^{t+1}(i)} \right) - \sum_{i \in [2]} x^*(i) \cdot \log \left( \frac{x^*(i)}{x^t(i)} \right) \\
&= \sum_{i \in [2]} x^*(i) \cdot \log \left( \frac{x^t(i)}{x^{t+1}(i)} \right) \\
&= \sum_{i \in [2]} x^*(i) \cdot \eta \ell^t(i) + \sum_{i \in [2]} x^*(i) \cdot \log \left( \sum_{j \in [2]} x^t(j) \cdot \exp(-\eta \ell^t(j)) \right) \\
&= \log \left( \sum_{j \in [2]} x^t(j) \cdot \exp(-\eta \ell^t(j)) \right) \\
&= \log \left( x_t \cdot \exp(-\eta(2y_t - 1)) + (1 - x_t) \cdot \exp(-\eta(1 - 2y_t)) \right) \\
&\geq x_t \cdot (-\eta(2y_t - 1)) + (1 - x_t) \cdot (-\eta(1 - 2y_t)) + \frac{1}{2e^6} x_t(1 - x_t) \left( e^{-\eta(2y_t - 1)} - e^{-\eta(1 - 2y_t)} \right)^2 \\
&\geq \eta(2y_t - 1)(1 - 2x_t) + e^{-7} \eta^2 x_t(1 - x_t)(2y_t - 1)^2. \tag{11}
\end{aligned}$$

385 The third step follows from the updating rule of vanilla Hedge. The fourth step uses  $x^*(1) = x^*(2) =$   
386  $0.5$  and  $\ell^t(1) + \ell^t(2) = (2y_t - 1) + (1 - 2y_t) = 0$ . The sixth step uses the fact that  $f(x) = -\log x$   
387 is  $e^{-6}$ -strongly convex on  $(0, e^3)$ . Similarly, we can prove

$$D_{\text{KL}}(y^* \| y^{t+1}) - D_{\text{KL}}(y^* \| y^t) \geq \eta(2x_t - 1)(2y_t - 1) + e^{-7} \eta^2 y_t(1 - y_t)(2x_t - 1)^2. \tag{12}$$

388 The lemma follows by combining (11) and (12).  $\square$

389 We are now ready to prove Lemma 4.3.

390 *Proof of Lemma 4.3.* We first prove that within  $O(1/\eta^2)$  steps, the KL divergence  $D_{\text{KL}}(x^* \| x^t) +$   
391  $D_{\text{KL}}(y^* \| y^t)$  becomes at least 20. The proof follows directly from Lemma B.4, as for any  $t$  with  
392  $D_{\text{KL}}(x^* \| x^t) + D_{\text{KL}}(y^* \| y^t) \leq 20$ , we have

$$\begin{aligned}
& D_{\text{KL}}(x^* \| x^{t+1}) + D_{\text{KL}}(y^* \| y^{t+1}) - (D_{\text{KL}}(x^* \| x^t) + D_{\text{KL}}(y^* \| y^t)) \\
&\geq e^{-7} \eta^2 x_t(1 - x_t)(2y_t - 1)^2 + e^{-7} \eta^2 y_t(1 - y_t)(2x_t - 1)^2 \geq \Omega(\eta^2). \tag{13}
\end{aligned}$$

393 The second step follows from the fact that both  $x_t$  and  $y_t$  are bounded away from 0 and 1 given the  
394 divergence at  $t$  is at most 20; it also used  $\max\{|2x_t - 1|, |2y_t - 1|\} \geq 0.2$  given that the divergence  
395 is strictly increasing.

396 Let  $T_0 = O(1/\eta^2)$  be the first time when the divergence becomes at least 20. If  $T/2 \leq T_0$ , it follows  
397 from (13) that the divergence at  $T$  is  $\Omega(T\eta^2) = \Omega(\sqrt{T}\eta)$  using the assumption that  $\eta \geq 16/\sqrt{T}$ . So  
398 we focus on the case  $T_0 \leq T/2$  and thus,  $T = T_0 + L$  with  $L \geq T/2$ . We prove

399 **Claim B.5.** *At round  $t = T_0 + \tau^2$ , the KL divergence has  $D_{\text{KL}}(x^* \| x^t) + D_{\text{KL}}(y^* \| y^t) \geq 10^{-10} \tau \eta$ .*

Setting  $\tau = \sqrt{T/2}$  so that  $T_0 + \tau^2 \leq T$ , we have

$$D_{\text{KL}}(x^* \| x^T) + D_{\text{KL}}(y^* \| y^T) \geq \Omega(\sqrt{T}\eta),$$

400 and this finishes the proof of the lemma.  $\square$

401 *Proof of Claim B.5.* We proceed to use induction on  $\tau$ . The cases with  $\tau \leq 16/\eta$  holds trivially as  
402 the KL divergence at  $T_0$  is already at least 20. For the induction step, suppose the claim holds up to  $k$   
403 for some  $k \geq 64/\eta$  at time  $t_0 = T_0 + k^2$ . We show that at time  $T_0 + (k + 1)^2$  the KL divergence  
404 is at least  $10^{-10}(k + 1)\eta$ . Without loss of generality, we assume that  $x_{t_0}, y_{t_0} \geq 0.5$ ; the other three  
405 cases can be handled similarly. In this region,  $x_t$  with  $t = t_0 + 1, \dots$  will keep decreasing and  $y_t$   
406 will keep increasing, until the moment when  $x_t$  drops below 0.5.

407 Let  $t_2$  denote the first round  $t_2 > t_0$  such that  $x_t \leq 0.5$ . We first show that it will take no more  
 408 than  $k/2$  rounds for  $x_t$  to drop below 0.5:  $t_2 - t_0 \leq k/2$ . To this end, we use  $t_1$  to denote the first  
 409 round  $t_1 \geq t_0$  such that  $y_t \geq 3/4$  and note that  $t_1 \leq t_2$  (since otherwise at  $t = t_2 - 1$ , we have  
 410  $1/2 \leq y_t \leq 3/4$  and  $1/2 \leq x_t \leq e^\theta$  in order for  $x_t$  to go below  $1/2$  with  $\eta \leq 3$  in the next round;  
 411 this contradicts with the fact that the KL divergence is at least 20 after  $T_0$ ).

412 We break the proof of  $t_2 - t_0 \leq k/2$  into two phases:  $t_1 - t_0 \leq k/4$  and  $t_2 - t_1 \leq k/4$ .

413 **Phase 1.** First we prove that it takes no more than  $k/4$  steps for  $y_t$  to get larger than  $3/4$ . To this  
 414 end, we notice that for all  $t \in [t_0 : t_1 - 1]$ , we have  $y_t \leq 3/4$  and thus,  $x_t \geq 3/4$  since the KL  
 415 divergence is at least 20. During all these rounds the loss vector  $\ell_y^t$  of the second player satisfies  
 416  $\ell_y^t(1) \leq -3/4 + 1/4 \leq -0.5$  and  $\ell_y^t(2) \geq 0.5$ . Thus we have (using  $0.5 \leq y_{t_0} \leq y_{t_1-1} \leq 3/4$ )

$$3 \geq \frac{y_{t_1-1}}{1 - y_{t_1-1}} \geq \exp(\eta(t_1 - t_0 - 1)) \cdot \frac{y_{t_0}}{1 - y_{t_0}} \geq \exp(\eta(t_1 - t_0 - 1)).$$

417 Thus  $t_1 - t_0 \leq (2/\eta) + 1 \leq k/4$  using  $k \geq 64/\eta$  and  $\eta \leq 3$ .

418 **Phase 2.** Next we prove that, starting from  $t_1$ , it takes less than  $k/4$  steps for  $x_t$  to drop below 0.5.  
 419 Note that for each  $t \in [t_1 : t_2 - 1]$ , the loss vector  $\ell_x^t$  of the first player satisfies  $\ell_x^t(1) \geq 0.5$  and  
 420  $\ell_x^t(2) \leq -0.5$ . Moreover, we assume without loss of generality that  $1 - x_{t_1} \geq \exp(-(k+1)\eta/20)$ ;  
 421 otherwise the KL divergence at  $t_1$  is already bigger than  $10^{-10}(k+1)\eta$  and we are done. Therefore,

$$1 \leq \frac{x_{t_2-1}}{1 - x_{t_2-1}} \leq \exp(-\eta(t_2 - t_1 - 1)) \cdot \frac{x_{t_1}}{1 - x_{t_1}} \leq \exp(\eta(-(t_2 - t_1 - 1) + (k+1)/20))$$

422 Thus  $t_2 - t_1 \geq 1 + (k+1)/20 \leq k/4$  using  $k \geq 64/\eta \geq 64/3$ .

Now we are at time  $t_2$  and we examine the next  $R = 3/\eta \leq k/2$  rounds  $[t_2 : t_2 + R]$ ; these are the  
 rounds where we will gain a lot in the KL divergence. Given that  $x_{t_2}$  just dropped below  $1/2$ , we  
 have  $x_{t_2} \geq 0.5 \cdot \exp(-2\eta)$  and thus, for every  $t \in [t_2 : t_2 + R]$ ,

$$x_t \geq x_{t_2} \cdot \exp(-2\eta \cdot R) \geq 0.5 \cdot e^{-12}.$$

423 Consequently, we have

$$\begin{aligned} & (D_{\text{KL}}(x^* \| x^{t_2+R}) + D_{\text{KL}}(y^* \| y^{t_2+R})) - (D_{\text{KL}}(x^* \| x^{t_2}) + D_{\text{KL}}(y^* \| y^{t_2})) \\ & \geq \sum_{t=t_2}^{t_2+R-1} e^{-7\eta^2} x_t (1 - x_t) (2y_t - 1)^2 + e^{-7\eta^2} y_t (1 - y_t) (2x_t - 1)^2 \\ & \geq \sum_{t=t_2}^{t_2+R-1} e^{-7\eta^2} x_t (1 - x_t) (2y_t - 1)^2 \geq \frac{3}{\eta} \cdot e^{-7\eta^2} \cdot \frac{1}{4} e^{-12} \cdot \frac{1}{4} \geq 10^{-10} \eta. \end{aligned}$$

424 So we conclude that after at most  $k/4 + k/4 + k/2 = k$  steps, the KL divergence increase at least  
 425  $10^{-10}\eta$ . Thus at time  $T_0 + k^2 + k \leq T_0 + (k+1)^2$ , the KL divergence is at least  $10^{-10}k\eta + 10^{-10}\eta$   
 426  $= 10^{-10}(k+1)\eta$ . This finishes the induction and the proof of the claim.  $\square$

## 427 C Missing proof from Section 5

### 428 C.1 Proof of Lemma 5.2

429 Fix any swap function  $\phi : [n] \rightarrow [n]$ . By Lemma 2.1, every  $\text{ALG}_j$  achieves low regret. Thus,

$$\sum_{t \in [T]} \langle q_j^t, x^t(j) \ell^t \rangle \leq \sum_{t \in [T]} x^t(j) \cdot \ell^t(\phi(j)) + \frac{2 \log n}{\eta} + \eta \sum_{t \in [T]} \|x^t(j) \ell^t - x^{t-1}(j) \ell^{t-1}\|_\infty^2, \quad (14)$$

430 where we used  $x^t = Q^t x^0$ , set  $\ell^0 = \mathbf{0}$  and  $x^0 = \mathbf{1}/n = x^1$ . Consequently, we have

$$\begin{aligned}
\sum_{t \in [T]} \langle x^t, \ell^t \rangle &= \sum_{t \in [T]} \langle x^t Q^t, \ell^t \rangle = \sum_{t \in [T]} \sum_{j \in [n]} \langle x^t(j) q_j^t, \ell^t \rangle = \sum_{j \in [n]} \sum_{t \in [T]} \langle q_j^t, x^t(j) \ell^t \rangle \\
&\leq \sum_{j \in [n]} \left( \sum_{t \in [T]} x^t(j) \cdot \ell^t(\phi(j)) + \frac{2 \log n}{\eta} + \eta \sum_{t \in [T]} \|x^t(j) \ell^t - x^{t-1}(j) \ell^{t-1}\|_\infty^2 \right) \\
&= \sum_{t \in [T]} \sum_{j \in [n]} x^t(j) \cdot \ell^t(\phi(j)) + \frac{2n \log n}{\eta} + \eta \sum_{t \in [T]} \sum_{j \in [n]} \|x^t(j) \ell^t - x^{t-1}(j) \ell^{t-1}\|_\infty^2
\end{aligned}$$

431 where the first inequality follows from (14). Furthermore, we have (using  $\|\ell^t\|_\infty \leq 1$  and  $\|x^t\|_1 = 1$ )

$$\begin{aligned}
\sum_{j \in [n]} \|x^t(j) \ell^t - x^{t-1}(j) \ell^{t-1}\|_\infty^2 &\leq \sum_{j \in [n]} \left( \|x^t(j) \ell^t - x^{t-1}(j) \ell^t\|_\infty + \|x^{t-1}(j) \ell^t - x^{t-1}(j) \ell^{t-1}\|_\infty \right)^2 \\
&\leq 2 \sum_{j \in [n]} \|x^t(j) \ell^t - x^{t-1}(j) \ell^t\|_\infty^2 + 2 \sum_{j \in [n]} \|x^{t-1}(j) \ell^t - x^{t-1}(j) \ell^{t-1}\|_\infty^2 \\
&= 2 \sum_{j \in [n]} (x^t(j) - x^{t-1}(j))^2 \|\ell^t\|_\infty^2 + 2 \sum_{j \in [n]} (x^{t-1}(j))^2 \|\ell^t - \ell^{t-1}\|_\infty^2 \\
&= 2 \left( \|x^t - x^{t-1}\|_2^2 \cdot \|\ell^t\|_\infty^2 + \|x^{t-1}\|_2^2 \cdot \|\ell^t - \ell^{t-1}\|_\infty^2 \right) \\
&\leq 2 \left( \|x^t - x^{t-1}\|_1^2 + \|\ell^t - \ell^{t-1}\|_\infty^2 \right)
\end{aligned}$$

432 We can combine all these inequalities (and note that  $x^0 = x^1$ ) to finish the proof of the lemma.

### 433 C.2 Proof of Lemma 5.3

434 We start the proof of Lemma 5.3 with the following definition.

435 **Definition C.1.** Given Markov chains  $Q, Q' \in \mathbb{R}^{n \times n}$ , we say  $Q'$  is  $(\eta_1, \dots, \eta_n)$ -approximate to  $Q$   
436 if  $(1 - \eta_i)q'_{i,j} \leq q_{i,j} \leq (1 + \eta_i)q'_{i,j}$  for every  $i, j \in [n]$ , where we write  $Q = (q_{i,j})$  and  $Q' = (q'_{i,j})$ .

437 We are ready to state our perturbation analysis on ergodic<sup>1</sup> Markov chains.

438 **Lemma C.2.** Given two ergodic Markov chains  $Q$  and  $Q'$ , where  $Q'$  is  $(\eta_1, \dots, \eta_n)$ -approximate to  
439  $Q$ , the stationary distribution  $p, p'$  of  $Q$  and  $Q'$ , respectively, satisfy  $\|p - p'\|_1 \leq 8 \sum_{i=1}^n \eta_i$ .

440 The proof of Lemma C.2 relies on the classical Markov chain tree theorem (see [1]). To state it we  
441 need the following definition.

442 **Definition C.3.** Suppose  $Q$  is an ergodic Markov chain and  $G = (V, E)$  with  $V = [n]$  is the weighted  
443 directed graph associated with  $Q$ . We say a subgraph  $T$  of  $G$  is a directed tree rooted at  $i \in [n]$  if (1)  
444  $T$  does not contain any cycles and (2) Node  $i$  has no outgoing edges, while every other node  $j \in [n]$   
445 has exactly one outgoing edge. For each node  $i \in [n]$ , we write  $\mathcal{T}_i$  to denote the set of all directed  
446 trees rooted at node  $i$ . We further define

$$\Sigma_i = \sum_{T \in \mathcal{T}_i} \prod_{(a,b) \in T} q_{a,b} \quad \text{and} \quad \Sigma = \sum_{i \in [n]} \Sigma_i,$$

447 i.e., the weight of  $T$  is the product of its edge weights and  $\Sigma_i$  is the sum of weights of trees in  $\mathcal{T}_i$ .

448 We can now formally state the Markov chain tree theorem.

449 **Theorem C.4** (Markov chain tree theorem; see [1]). Suppose  $Q$  is an ergodic Markov chain and  $p$  is  
450 its stationary distribution. Then we have  $p_i = \Sigma_i / \Sigma$  for every  $i \in [n]$ .

451 We now use the Markov chain tree theorem to prove Lemma C.2.

<sup>1</sup>Note that  $Q^t$  used in BM-Optimistic-Hedge is always ergodic.



452 *Proof of Lemma C.2.* Note that the lemma is trivial when  $\sum_{i=1}^n \eta_i > 1/4$  so we assume without loss  
 453 of generality that  $\sum_{i=1}^n \eta_i \leq 1/4$ . For any  $i \in [n]$ , we have

$$\begin{aligned} \Sigma_i &= \sum_{T \in \mathcal{T}_i} \prod_{(a,b) \in T} q_{a,b} \leq \sum_{T \in \mathcal{T}_i} \prod_{(a,b) \in T} (1 + \eta_a) \tilde{q}_{a,b} \\ &\leq \prod_{j \in [n]} (1 + \eta_j) \sum_{T \in \mathcal{T}_i} \prod_{(a,b) \in T} q'_{a,b} = \prod_{j \in [n]} (1 + \eta_j) \cdot \Sigma'_i \leq \left(1 + 2 \sum_{j \in [n]} \eta_j\right) \Sigma'_i. \end{aligned} \quad (15)$$

454 The third step holds because for any tree  $T \in \mathcal{T}_i$ , each node, other than node  $i$ , appears exactly once  
 455 as  $a$  when calculating the weight of  $T$ . The last step follows from the fact that when  $\sum_{i=1}^n \eta_i \leq 1/4$ ,

$$\prod_{j \in [n]} (1 + \eta_j) \leq \prod_{j \in [n]} e^{\eta_j} = e^{\sum_{j \in [n]} \eta_j} \leq 1 + 2 \sum_{j \in [n]} \eta_j.$$

456 Similarly, we have

$$\Sigma_i \geq \sum_{T \in \mathcal{T}_i} \prod_{(a,b) \in T} (1 - \eta_a) \tilde{q}_{a,b} \geq \prod_{j \in [n]} (1 - \eta_j) \cdot \Sigma'_i \geq \left(1 - 2 \sum_{j \in [n]} \eta_j\right) \Sigma'_i. \quad (16)$$

457 The last inequality holds since, for  $\sum_{j=1}^n \eta_j \leq 1/2$ , we have

$$\prod_{j \in [n]} (1 - \eta_j) \geq \prod_{j \in [n]} e^{-2\eta_j} = \exp\left(-2 \sum_{j \in [n]} \eta_j\right) \geq 1 - 2 \sum_{j \in [n]} \eta_j.$$

458 Since  $\Sigma = \sum_i \Sigma_i$ , we have  $(1 - 2 \sum_i \eta_i) \tilde{\Sigma} \leq \Sigma \leq (1 + 2 \sum_i \eta_i) \tilde{\Sigma}$ . Applying Theorem C.4,

$$\begin{aligned} \|p - p'\|_1 &= \sum_{i \in [n]} |p_i - p'_i| = \sum_{i \in [n]} \left| \Sigma_i / \Sigma - \Sigma'_i / \Sigma' \right| \leq \sum_{i \in [n]} \left| \Sigma_i / \Sigma - \Sigma_i / \Sigma' \right| + \sum_{i \in [n]} \left| \Sigma_i / \Sigma' - \Sigma'_i / \Sigma' \right| \\ &\leq \sum_{i \in [n]} \frac{2 \sum_{i=1}^n \eta_i}{1 - 2 \sum_{i=1}^n \eta_i} \left| \Sigma_i / \Sigma \right| + \sum_{i \in [n]} 2 \sum_{j \in [n]} \eta_j \cdot \left| \Sigma'_i / \Sigma' \right| \leq 6 \sum_{i \in [n]} \eta_i. \end{aligned}$$

459 This finishes the proof of the lemma.  $\square$

460 Finally we prove Lemma 5.3:

461 *Proof of Lemma 5.3.* We start with the following claim, which states that entries of  $Q^t$  and  $Q^{t-1}$   
 462 only differs by a small multiplicative factor.

463 **Claim C.5.** Suppose that the learning rate  $\eta \leq 1/6$  and let  $x^0 = \mathbf{1}/n = x^1$ . Then for any  $t \geq 2$ ,  $Q^t$   
 464 is a  $(\eta_1, \dots, \eta_n)$ -approximate to  $Q^{t-1}$ , where  $\eta_j = 2\eta x^{t-2}(j) + 4\eta x^{t-1}(j)$  for each  $j \in [n]$ .

465 Combing Claim C.5 and Lemma C.2, we have

$$\|x^t - x^{t-1}\|_1 \leq 8 \sum_{j \in [n]} \eta_j = 8 \sum_{j \in [n]} (2x^{t-2}(j) + 4x^{t-1}(j)) \eta = 48\eta.$$

466 This finishes the proof of Lemma 5.3.  $\square$

467 *Proof of Claim C.5.* Let  $x^0 = \mathbf{1}/n = x^1$ . By the updating rule of optimisitic Hedge, we have for  
 468 any  $t \geq 2$ ,  $i, j \in [n]$  that

$$\begin{aligned} q_j^t(i) &= \frac{\exp(-\eta(2x^{t-1}(j)\ell^{t-1}(i) - x^{t-2}(j)\ell^{t-2}(i))) \cdot q_j^{t-1}(i)}{\sum_{k \in [n]} \exp(-\eta(2x^{t-1}(j)\ell^{t-1}(k) - x^{t-2}(j)\ell^{t-2}(k))) \cdot q_j^{t-1}(k)} \\ &\leq \frac{\exp(\eta x^{t-2}(j)) \cdot q_j^{t-1}(i)}{\sum_{k \in [n]} \exp(-2\eta x^{t-1}(j)) \cdot q_j^{t-1}(k)} \\ &= \exp(\eta x^{t-2}(j) + 2\eta x^{t-1}(j)) \cdot q_j^{t-1}(i) \\ &\leq (1 + 2\eta x^{t-2}(j) + 4\eta x^{t-1}(j)) \cdot q_j^{t-1}(i). \end{aligned}$$

469 The second step follows from  $\ell^t \in [0, 1]^n$  and the last step follows from  $\exp(a) \leq 1 + 2a$  for  $a \leq 1/2$ .  
 470 The other side holds similarly:

$$\begin{aligned}
 q_j^t(i) &= \frac{\exp(-\eta(2x^{t-1}(j)\ell^{t-1}(i) - x^{t-2}(j)\ell^{t-2}(i))) \cdot q_j^{t-1}(i)}{\sum_{k \in [n]} \exp(-\eta(2x^{t-1}(j)\ell^{t-1}(k) - x^{t-2}(j)\ell^{t-2}(k))) \cdot q_j^{t-1}(k)} \\
 &\geq \frac{\exp(-2\eta x^{t-1}(j)) \cdot q_j^{t-1}(i)}{\sum_{k \in [n]} \exp(\eta x^{t-2}(j)) \cdot q_j^{t-1}(k)} \\
 &= \exp(-\eta x^{t-2}(j) - 2\eta x^{t-1}(j)) \cdot q_j^{t-1}(i) \\
 &\geq (1 - \eta x^{t-2}(j) - 2\eta x^{t-1}(j)) \cdot q_j^{t-1}(i).
 \end{aligned}$$

471 Thus completing the proof.  $\square$

### 472 C.3 Proof of Corollary 5.4

The algorithm works as follow. We set

$$\eta = \frac{(n \log n)^{1/4}}{m^{1/2} T^{1/4}}$$

473 and  $B_r = 1$  at initialization, for any player  $i \in [m]$  and  $\tau = 1, \dots, T$

- 474 1. Play  $x_i^t$  according to BM-Optimistic-Hedge, and receive  $\ell_i^t$ .
- 475 2. If  $\sum_{t=2}^{\tau} \|\ell_i^t - \ell_i^{t-1}\|_{\infty}^2 + \sum_{t=2}^{\tau} \|x_i^t - x_i^{t-1}\|_1^2 \geq B_r$ .
  - 476 (a) Update  $B_{r+1} = 2B_r$ ,  $r \leftarrow r + 1$ ,  $\eta_r = \min \left\{ \sqrt{\frac{n \log n}{B_r}}, \eta \right\}$ .
  - 477 (b) Start a new run of BM-Optimistic-Hedge with learning rate  $\eta_r$ .

478 For any round  $r$ , we use  $T_r$  to denote its final iteration and

$$I_r = \sum_{t=T_{r-1}+1}^{T_r} \|x_i^t - x_i^{t-1}\|_1^2 + \sum_{t=T_{r-1}+1}^{T_r} \|\ell_i^t - \ell_i^{t-1}\|_{\infty}^2.$$

479 Then we have

$$\begin{aligned}
 \text{swap-regret}_{T_{r-1}+1:T_r} &\leq \frac{2n \log n}{\eta_r} + 2\eta_r \left( \sum_{t=T_{r-1}+1}^{T_r} \|x_i^t - x_i^{t-1}\|_1^2 + \sum_{t=T_{r-1}+1}^{T_r} \|\ell_i^t - \ell_i^{t-1}\|_{\infty}^2 \right) \\
 &\leq 2(n \log n)^{3/4} \cdot T^{1/4} m^{1/2} + 2\sqrt{n \log n B_r} + 2\eta_r \cdot I_r \\
 &\leq 2(n \log n)^{3/4} \cdot T^{1/4} m^{1/2} + 2\sqrt{n \log n B_r} + 2\sqrt{2n \log n I_r} \\
 &\leq 2(n \log n)^{3/4} \cdot T^{1/4} m^{1/2} + 4\sqrt{2n \log n I_r} \\
 &\leq 2(n \log n)^{3/4} \cdot T^{1/4} m^{1/2} + 4\sqrt{2n \log n} \cdot \sqrt{\left( \sum_{t=2}^T \|x_i^t - x_i^{t-1}\|_1^2 + \sum_{t=2}^T \|\ell_i^t - \ell_i^{t-1}\|_{\infty}^2 \right)}
 \end{aligned}$$

480 The first step follows from Lemma 5.2, the second step follows from the definition of  $I_r$  and the fact

$$\frac{1}{\eta_r} \leq \frac{1}{\eta} + \sqrt{\frac{B_r}{n \log n}} = \frac{m^{1/2} T^{1/4}}{(n \log n)^{1/4}} + \sqrt{\frac{B_r}{n \log n}}$$

481 The third step follows from  $\eta_r \leq \sqrt{\frac{n \log n}{B_r}} \leq \sqrt{\frac{n \log n}{I_r/2}}$ , and the last step comes from  $\sqrt{B_r} \leq \sqrt{2I_r}$ .

482 Since the number of round is at most  $O(\log T)$ , we have

$$\text{swap-regret}_T \leq \log T \left( 2(n \log n)^{3/4} T^{1/4} m^{1/2} + 4\sqrt{2n \log n} \cdot \sqrt{2 \left( \sum_{t=1}^T \|x_i^t - x_i^{t-1}\|_1^2 + \sum_{t=1}^T \|\ell_i^t - \ell_i^{t-1}\|_{\infty}^2 \right)} \right)$$

483 If all players adopt the algorithm, then we know their learning rate is no greater than  $\eta = \frac{(n \log n)^{1/4}}{m^{1/2} T^{1/4}}$ ,  
 484 thus we know  $\|x_i^t - x_i^{t-1}\|_1 \leq O(\eta) = O\left(\frac{(n \log n)^{1/4}}{m^{1/2} T^{1/4}}\right)$  (see Lemma 5.3) and  $\|\ell_i^t - \ell_i^{t-1}\|_\infty \leq$   
 485  $\sum_{j \neq i} \|x_j^t - x_j^{t-1}\|_1 \leq m \cdot O(\eta) = O\left(\frac{m^{1/2} (n \log n)^{1/4}}{T^{1/4}}\right)$ . Thus the swap regret is at most

$$O\left((n \log n)^{3/4} m^{1/2} T^{1/4} \log T\right).$$

486 If the player is facing an adversary, then  $\|x_i^t - x_i^{t-1}\|_1 \leq 2$  and  $\|\ell_i^t - \ell_i^{t-1}\|_\infty \leq 1$ , thus we conclude  
 487 its regret is at most

$$O\left(\sqrt{n \log n T} \log T + (n \log n)^{3/4} m^{1/2} T^{1/4} \log T\right).$$

## 488 D Another no swap regret algorithm

489 We prove the optimistic variant of a folklore algorithm, originally appeared in [7], could also achieve  
 490 fast convergence of swap regret. Our perturbation analysis again plays a key role in the regret analysis.

491 Define  $\Phi$  to be all swap functions that map  $[n]$  to  $[n]$ . We have  $|\Phi| = n^n$ . For any  $\phi \in \Phi$ , define the  
 492 swap matrix  $S^\phi$  as:  $S_{i,j}^\phi = 1$  if  $\phi(i) = j$  and  $S_{i,j}^\phi = 0$  otherwise. It is easy to see that  $S^\phi$  contains  
 493 exactly one 1 each row.

494 [7] treats each swap matrix  $S^\phi$  as an expert, and run Hedge algorithm on all  $n^n$  swap matrices. At  
 495 time  $t$ , the output strategy  $p^t$  is determined by these experts via solving a fix point problem<sup>2</sup>. The  
 496 optimistic variant of [7] is shown in Algorithm 1. We first analysis the regret,

---

### Algorithm 1

---

- 1: **for**  $t = 1, 2, \dots$ , **do**
- 2:   Play  $p^t$  and receive the loss vector  $l^t$ .
- 3:   Update

$$q^{t+1}(\phi) = \frac{x^t(\phi) \exp(-\eta(2x^t S^\phi \ell^t - x^{t-1} S^\phi \ell^{t-1}))}{\sum_{\phi \in \Phi} x^t(\phi) \exp(-\eta(2x^t S^\phi \ell^t - x^{t-1} S^\phi \ell^{t-1}))} \quad \forall \phi \in \Phi$$

- 4:   Compute  $x^{t+1} = x^{t+1} Q^{(t+1)}$ , where

$$Q^{(t+1)} = \sum_{\phi \in \Phi} q^{t+1}(\phi) S^\phi.$$

- 5: **end for**
- 

497 **Lemma D.1.** *Algorithm 1 achieves regret*

$$\text{swap-regret}_T \leq \frac{n \log n}{\eta} + 2\eta \sum_{t=2}^T \|x^t - x^{t-1}\|_1^2 + 2\eta \sum_{t=2}^T \|\ell^t - \ell^{t-1}\|_\infty^2.$$

---

<sup>2</sup>The algorithm is not efficient in general. However, we can turn it into an efficient one by considering only  $n^2$  swap matrices that are equal to identical mapping *except* for one coordinate. The regret bound will only blow up by a  $\sqrt{n}$  factor.

498 *Proof.* According to the updating rule, for any  $\phi \in \Phi$ , we have

$$\begin{aligned}
\text{swap-regret}_T &= \sum_{t=2}^T \langle x^t, \ell^t \rangle - \max_{\phi \in \Phi} \sum_{t=2}^T x^t S^\phi \ell^t \\
&= \sum_{t=2}^T \langle x^t Q^{(t)}, \ell^t \rangle - \max_{\phi \in \Phi} \sum_{t=2}^T x^t S^\phi \ell^t \\
&= \sum_{t=2}^T \sum_{\phi \in \Phi} x^t (q^t(\phi) S^\phi) \ell^t - \max_{\phi \in \Phi} \sum_{t=2}^T x^t S^\phi \ell^t \\
&= \sum_{t=2}^T \sum_{\phi \in \Phi} q^t(\phi) \cdot x^t S^\phi \ell^t - \max_{\phi \in \Phi} \sum_{t=2}^T x^t S^\phi \ell^t \\
&\leq \frac{n \log n}{\eta} + \eta \sum_{t=2}^T \max_{\phi \in \Phi} |x^t S^\phi \ell^{t-1} - x^{t-1} S^\phi \ell^{t-1}|^2 \\
&\leq \frac{\log n}{\eta} + 2\eta \sum_{t=2}^T \|x^t - x^{t-1}\|_1^2 + 2\eta \sum_{t=2}^T \|\ell^t - \ell^{t-1}\|_\infty^2.
\end{aligned}$$

499 The fifth step follows the regret bound of optimistic Hedge and the last step follows from the fact that  
500 for any  $\phi \in \Phi$ ,

$$\begin{aligned}
|x^t S^\phi \ell^t - x^{t-1} S^\phi \ell^t|^2 &= |x^t S^\phi \ell^t - x^{t-1} S^\phi \ell^t + x^{t-1} A_\phi \ell^t - x^{t-1} S^\phi \ell^{t-1}|^2 \\
&\leq 2|x^t S^\phi \ell^t - x^{t-1} S^\phi \ell^t|^2 + 2|x^{t-1} S^\phi \ell^t - x^{t-1} S^\phi \ell^{t-1}|^2 \\
&= 2\langle x^t - x^{t-1}, S^\phi \ell^t \rangle + 2\langle x^{t-1} S^\phi, \ell^t - \ell^{t-1} \rangle \\
&\leq 2\|x^t - x^{t-1}\|_1^2 \|S^\phi \ell^t\|_\infty^2 + 2\|x^{t-1} S^\phi\|_1 \|\ell^t - \ell^{t-1}\|_\infty^2 \\
&\leq 2\|x^t - x^{t-1}\|_1^2 + 2\|\ell^t - \ell^{t-1}\|_\infty^2.
\end{aligned}$$

501 Thus completing the proof. □

502 It remains to show that the environment is stable. Again, since  $x^t$  is the stationary distribution of  
503  $Q^{(t)}$ , we only need some perturbation analysis on  $Q^{(t)}$ . In particular, we have

504 **Lemma D.2.** For any  $t$ ,  $Q^{(t)}$  is  $(6\eta, \dots, 6\eta)$  approximate to  $Q^{(t+1)}$ .

505 *Proof.* For any  $\phi$ , we have

$$\begin{aligned}
q^{t+1}(\phi) &= \frac{q^t(\phi) \exp(-\eta(2x^t A_\phi \ell^t - x^{t-1} A_\phi \ell^{t-1}))}{\sum_{\phi \in \Phi} q^t(\phi) \exp(-\eta(2x^t A_\phi \ell^t - x^{t-1} A_\phi \ell^{t-1}))} \\
&\leq \frac{q^t(\phi) \exp(\eta)}{\sum_{\phi \in \Phi} q^t(\phi) \exp(-2\eta)} \\
&\leq (1 + 6\eta) q^t(\phi)
\end{aligned}$$

506 Similarly, we have

$$\begin{aligned}
q^{t+1}(\phi) &= \frac{q^t(\phi) \exp(-\eta(2x^t A_\phi \ell^t - x^{t-1} A_\phi \ell^{t-1}))}{\sum_{\phi \in \Phi} q^t(\phi) \exp(-\eta(2x^t A_\phi \ell^t - x^{t-1} A_\phi \ell^{t-1}))} \\
&\geq \frac{q^t(\phi) \exp(-2\eta)}{\sum_{\phi \in \Phi} q^t(\phi) \exp(\eta)} \\
&\geq (1 - 6\eta) q^t(\phi)
\end{aligned}$$

507 Thus, for any  $i, j \in [n]$ , we have

$$Q_{i,j}^{(t+1)} = \sum_{\phi \in \Phi} q^{t+1}(\phi) S_{i,j}^\phi \leq (1 + 6\eta) \sum_{\phi \in \Phi} q^t(\phi) S_{i,j}^\phi = (1 + 6\eta) Q_{i,j}^{(t)}$$

508 and

$$Q_{i,j}^{(t+1)} = \sum_{\phi \in \Phi} q^{t+1}(\phi) S_{i,j}^{\phi} \geq (1 - 6\eta) \sum_{\phi \in \Phi} q^t(\phi) S_{i,j}^{\phi} \geq (1 - 6\eta) Q_{i,j}^{(t)}$$

509 Thus we conclude  $Q^{(t)}$  is  $(6\eta, \dots, 6\eta)$  approximate to  $Q^{(t+1)}$ .  $\square$

510 Combining the above results, we have

511 **Theorem D.3.** *Suppose every player uses Algorithm 1 and choose  $\eta = O\left(\left(\frac{\log n}{nm^2T}\right)^{1/4}\right)$ , then each*  
 512 *individual's swap regret is at most  $O\left(m^{1/2}n^{5/4}(\log n)^{3/4}T^{1/4}\right)$ .*

513 *Proof.* By Lemma D.1, for any palyer  $i \in [m]$ , we have

$$\begin{aligned} \text{swap-regret}_T &\leq \frac{n \log n}{\eta} + 2\eta \sum_{t=2}^T \|x_i^t - x_i^{t-1}\|_1^2 + 2\eta \sum_{t=2}^T \|\ell_i^t - \ell_i^{t-1}\|_{\infty}^2 \\ &\leq \frac{n \log n}{\eta} + 2\eta \sum_{t=2}^T \|x^t - x^{t-1}\|_1^2 + 2m\eta \sum_{t=2}^T \sum_{j \neq i} \|x_j^t - x_j^{t-1}\|_1^2 \end{aligned}$$

514 where  $w^t$  denotes the other player's strategy. Moreover, since  $Q^{(t-1)}$  is  $(6\eta, \dots, 6\eta)$  approximates  
 515 to  $Q^{(t)}$ , we know

$$\|x_i^t - x_i^{t-1}\|_1 \leq 8 \cdot \sum_{i=1}^n 6\eta = O(n\eta)$$

516 holds for any  $i$ . Thus we have

$$\begin{aligned} \text{swap-regret}_T &\leq \frac{n \log n}{\eta} + 2\eta \sum_{t=2}^T \|x^t - x^{t-1}\|_1^2 + 2m\eta \sum_{t=2}^T \sum_{j \neq i} \|x_j^t - x_j^{t-1}\|_1^2 \\ &\leq \frac{n \log n}{\eta} + O(\eta^3 n^2 m^2 T). \end{aligned}$$

517 Choosing  $\eta = O\left(\left(\frac{\log n}{nm^2T}\right)^{1/4}\right)$ , the regret is

$$\text{swap-regret}_T = O\left(n^{5/4}(\log n)^{3/4}T^{1/4}m^{1/2}\right).$$

518  $\square$

## 519 E Price of anarchy

520 In this section, we show that a large class of no swap regret algorithm satisfies the *low approximate*  
 521 *regret* property (see Definition E.2). Thus when all players adopt such algorithm, they experience fast  
 522 convergence to an approximately optimal social welfare in *smooth games* (see Definition E.1). In  
 523 particular, we show that the average social welfare converges to an approximately optimal welfare  
 524 at rate  $O(1/T)$ . The proof in this section is straightforward, our aim is to point out that such fast  
 525 convergence rate generally holds for no-swap regret algorithms. We first introduce the smooth game.  
 526 Recall  $\mathcal{L}(\mathbf{x}) = \sum_{i \in [m]} \mathcal{L}_i(\mathbf{x})$  is the summation of each individual's loss under strategy profile  $\mathbf{x}$ .

527 **Definition E.1** (Smooth game). *A cost minimization game is  $(\lambda, \mu)$ -smooth if for all strategy profiles*  
 528  *$\mathbf{x}$  and  $\mathbf{x}^*$ ,  $\sum_i \mathcal{L}_i(x_i^*, x_{-i}) \leq \lambda \cdot \mathcal{L}(\mathbf{x}^*) + \mu \cdot \mathcal{L}(\mathbf{x})$ .*

529 A wide range of games belongs to smooth game, including routing games, auctions, etc. We refer  
 530 interested reader to [25] for detailed coverage.

531 We next introduce the definition of low approximate regret.

532 **Definition E.2** (Low approximate regret [14]). *A learning algorithm satisfies the low approximate*  
 533 *regret property for given parameters  $(\epsilon, A(n))$ , if*

$$(1 - \epsilon) \sum_{t=1}^T \langle x^t, \ell^t \rangle \leq \min_i L(i) + \frac{A(n)}{\epsilon}.$$

534 **Lemma E.3.** *The BM reduction transfers the low approximate regret property. In particular, if we*  
 535 *reduce from a no external regret algorithm satisfying low approximate regret with  $(\epsilon, A(n))$ , then the*  
 536 *no swap regret algorithm satisfies low approximate regret with  $(\epsilon, nA(n))$ .*

537 *Proof.* For any fixed  $i$ , using the low approximate regret property, we know

$$(1 - \epsilon) \sum_{t=1}^T \langle q_j^t, x^t(j) \ell_t \rangle \leq \min_{i'} \sum_{t=1}^T x^t(j) \ell^t(i') + \frac{A(n)}{\epsilon} \leq \sum_{t=1}^T x^t(j) \ell_t(i) + \frac{A(n)}{\epsilon}.$$

538 Consequently, we have

$$\begin{aligned} (1 - \epsilon) \sum_{t=1}^T \langle x^t, \ell^t \rangle &= (1 - \epsilon) \sum_{t=1}^T \langle x^t Q^{(t)}, \ell^t \rangle \\ &= (1 - \epsilon) \sum_{t=1}^T \sum_{j=1}^n \langle x^t(j) q_j^t, \ell^t \rangle \\ &= (1 - \epsilon) \sum_{j=1}^n \sum_{t=1}^T \langle q_j^t, x^t(j) \ell^t \rangle \\ &\leq \sum_{j=1}^n \left( \sum_{t=1}^T x^t(j) \ell^t(i) + \frac{A(n)}{\epsilon} \right) \\ &= \sum_{t=1}^T \sum_{j=1}^n x^t(j) \ell^t(i) + \frac{nA(n)}{\epsilon} \\ &= \sum_{t=1}^T \ell^t(i) + \frac{nA(n)}{\epsilon}. \end{aligned}$$

539 Thus concluding the proof. □

540 A direct corollary of Lemma E.3 and Theorem 3 in [14] is

541 **Theorem E.4.** *In a  $(\lambda, \mu)$ -smooth game, if all players use no swap regret algorithm generated from*  
 542 *BM reduction and a no external regret algorithm satisfying low approximate regret property with*  
 543 *parameter  $\epsilon$  and  $A(n) = \log n$ , then we have*

$$\frac{1}{T} \sum_{t=1}^T \mathcal{L}(\mathbf{x}_t) \leq \frac{\lambda}{1 - \mu - \epsilon} \cdot \text{OPT} + \frac{m}{T} \cdot \frac{1}{1 - \mu - \epsilon} \cdot \frac{n \log n}{\epsilon}.$$

544 where OPT denotes the optimal social welfare, i.e.,  $\min_{\mathbf{x}} \mathcal{L}(\mathbf{x})$ .
